# Supplementary material
Source: Springer Nature journal article supplement (https://www.springermedizin.de/resource/supplementary/12889_2010_2817_MOESM4_ESM.pdf/9490028)
Supplement: MOESM4 [file 9490028]

Pattern Matrix (WAO, 2003-2005)

|                                                               | Component |      |      |       |       |       |      |
|---------------------------------------------------------------|-----------|------|------|-------|-------|-------|------|
|                                                               | 1         | 2    | 3    | 4     | 5     | 6     | 7    |
| Work without frequent deadlines                               | ,794      |      |      |       |       |       |      |
| Work without managerial tasks                                 | ,634      |      |      |       |       |       |      |
| Work without high action tempo                                | ,615      |      |      |       |       |       |      |
| Predictable working situation                                 | ,541      |      |      |       |       |       |      |
| Cope with conflicts                                           | ,509      |      |      |       |       |       | ,427 |
| Possibilities to fall back on direct colleagues and superiors | ,492      |      |      |       |       | -,370 |      |
| Work without constant interruptions                           | ,473      |      |      |       |       |       |      |
| Work without increased personal risk                          | ,377      |      |      |       |       |       |      |
| Does not realize a wrong approach                             |           | ,799 |      |       |       |       |      |
| Does not choose an alternative approach                       |           | ,772 |      |       |       |       |      |
| Does not decide about approach                                |           | ,703 |      |       |       |       |      |
| Does not think of alternatives                                |           | ,609 |      |       |       |       |      |
| Does not appeal to colleagues for help                        |           | ,555 |      |       |       |       |      |
| Does not check the proceedings of actions                     |           | ,530 |      |       |       |       |      |
| Does not stop when the goal is achieved                       |           | ,523 |      |       |       |       |      |
| Does not act in a logical sequence                            |           | ,515 |      |       |       |       |      |
| Does not persist until the goal is reached                    |           | ,397 |      |       | -,323 |       |      |
| No insight into one's own capacities and disabilities         |           |      |      |       |       |       |      |
| Reading                                                       |           |      | ,724 |       |       |       |      |
| Writing                                                       |           |      | ,692 |       |       |       |      |
| Seeing                                                        |           |      | ,572 |       |       |       |      |
| Speaking                                                      |           |      | ,434 |       |       |       |      |
| Transportation                                                |           |      | ,424 |       |       |       |      |
| Hearing                                                       |           |      |      |       |       |       |      |
| Focusing attention / concentration                            |           |      |      | -,765 |       |       |      |
| Dividing attention                                            |           |      |      | -,732 |       |       |      |
| Memory                                                        |           |      |      | -,713 |       |       |      |
| Action tempo                                                  |           |      |      | -,322 |       |       |      |
| Lacking initiative                                            |           |      |      |       | -,782 |       |      |
| Does not set targets                                          |           |      |      |       | -,707 |       |      |
| Does not start in time                                        |           |      |      |       | -,698 |       |      |
| Pre-structured tasks                                          |           |      |      |       |       | -,636 |      |
| Working under intensive coaching                              |           |      |      |       |       | -,615 |      |
| Fixed and familiar methods of working                         |           |      |      |       |       | -,586 |      |
| No distractions by others                                     |           |      |      |       |       | -,384 |      |
| No direct contact with colleagues required                    |           |      |      |       |       |       | ,712 |
| No direct contacts with clients                               |           |      |      |       |       |       | ,680 |
| No direct contacts with patients/people needing help          |           |      |      |       |       |       | ,650 |
| Teamwork                                                      |           |      |      |       |       |       | ,633 |
| Expressing personal feelings                                  |           |      |      |       |       |       | ,571 |
| Dealing with the emotional problems of other people           | ,304      |      |      |       |       |       | ,460 |

Extraction Method: Principal Component Analysis.

Rotation Method: Oblimin with Kaiser Normalization.

KMO: 0.928; MSA > 0.643

Cumulative percentage of variance explained (seven factors): 46.7%
